# Supplementary material for: PARIS/ZNF746 DNA-binding domain deficiency promotes adipose tissue hyperplasia and hepatic lipid accumulation
Source: Research Square preprint supplement (doi:10.21203/rs.3.rs-6475517/v1), 2025-06-17
Supplement: Supplementary file 2 [file 4143c76e80858b8ace972a4c.xlsx]

## Sheet: Primer sequences used in the st
Gene name	Primer type	Sequence (5’→3’)	Application	Species
Il6	F	CTGGGAAATCGTGGAAATGAG	RT-PCR	Mouse
Il6	R	GGACTCTGGCTTTGTCTTTCTTG	RT-PCR	Mouse
Il10	F	CCCTTTGCTATGGTGTCCTTTC	RT-PCR	Mouse
Il10	R	AGGATCTCCCTGGTTTCTCTTC	RT-PCR	Mouse
Adipoq	F	TGCCGAAGATGACGTTACTACAAC	RT-PCR	Mouse
Adipoq	R	CTTCAGCTCCTGTCATTCCAAC	RT-PCR	Mouse
Fasn	F	AGCAGGCACACACAATGGAC	RT-PCR	Mouse
Fasn	R	GAAGAAGAAAGAGAGCCGGTTG	RT-PCR	Mouse
Acaca	F	TGGATGAACCATCTCCGTTG	RT-PCR	Mouse
Acaca	R	CATGTGAAAGGCCAAACCATC	RT-PCR	Mouse
Srebf1	F	GGAGCCATGGATTGCACATT	RT-PCR	Mouse
Srebf1	R	GGCCCGGGAAGTCACTGT	RT-PCR	Mouse
Cebpa	F	GCCTTCAACGACGAGTTCC	RT-PCR	Mouse
Cebpa	R	CCCGGGTAGTCAAAGTCACC	RT-PCR	Mouse
Pparg (isoform1)	F	GAAGCGGTGAACCACTGATATTC	RT-PCR	Mouse
Pparg (isoform2)	F	TGTTGACCCAGAGCATGGTG	RT-PCR	Mouse
Pparg (isoform1 & 2)	R	CACAGAGCTGATTCCGAAGTTG	RT-PCR	Mouse
Znf746	F	TTGTGACTGACTGGACTTGTGG	RT-PCR	Mouse
Znf746	R	TTCTGAGCTTTCAGGCCATC	RT-PCR	Mouse
Ppargc1a	F	AGACGGATTGCCCTCATTTG	RT-PCR	Mouse
Ppargc1a	R	CAGGGTTTGTTCTGATCCTGTG	RT-PCR	Mouse
Slc2a2	F	GTCCAGAAAGCCCCAGATACC	RT-PCR	Mouse
Slc2a2	R	GTGACATCCTCAGTTCCTCTTAG	RT-PCR	Mouse
Cd36	F	CCACATTTCCTACATGCAAGTCC	RT-PCR	Mouse
Cd36	R	TCCCAGTCTCATTTAGCCACAG	RT-PCR	Mouse
Acly	F	TGATGGGAGAAGTTGGGAAG	RT-PCR	Mouse
Acly	R	TAAGGAGGAAGTTGGCAGTGTG	RT-PCR	Mouse
Znf746 flox	F	CCAGTACTGCCAAAGACAGC	Genotyping	Mouse
Znf746 flox	R	TTGGGACCTCACTACCGTTC	Genotyping	Mouse
CAG-Cre	F	ACCTGAAGATGTTCGCGATTATCT	Genotyping	Mouse
CAG-Cre	R	ACCGTCAGTACGTGAGATATCTT	Genotyping	Mouse
Znf746 KO	F	CCAGTACTGCCAAAGACAGC	Genotyping	Mouse
Znf746 KO	R	ACCTCTGAAAGCCACACCTC	Genotyping	Mouse
