# Supplementary material for: PARIS/ZNF746 DNA-binding domain deficiency promotes adipose tissue hyperplasia and hepatic lipid accumulation
Source: Research Square preprint supplement (doi:10.21203/rs.3.rs-6475517/v1), 2025-06-17
Supplement: Supplementary file 4 [file d031cdf70a25f90eb6083ef1.xlsx]

## Sheet: Antibodies used in the study
Target protein	Host	Antibody type	Dilution	Source	Catalog number	Application
PPARγ	Rabbit	monoclonal	1:1,000	Cell signaling Technology	2435T	WB
PARIS	mouse	monoclonal	1:5,000	millipore	MABN476	WB
PARIS	Rabbit	polyclonal	1:5,000	Proteintech	24543-1-AP (lot: 00076814)	WB
